# Supplementary material for: A Role for Both Conformational Selection and Induced Fit in Ligand Binding by the LAO Protein
Source: PubMed Central journal article supplement (PMC3102756; doi:10.1371/journal.pcbi.1002054), 2011-05-26
Supplement: pcbi.1002054.s012.pdf [file pcbi.1002054.s012.pdf]

### Text S3: Implied timescales calculation

Examining the behaviors of the implied timescales is one way to check if the model is Markovian [1]. Implied timescales ( $\tau_k$ ) can be calculated as below:

$$\tau_k = -\frac{\tau}{\ln \mu_k(\tau)} \quad (1)$$

where  $\mu_k$  is an eigenvalue of the transition matrix with the lag time  $\tau$ . Each implied timescale describes an aggregate transition between subsets of macrostates. If the model is Markovian and Eq. (1) holds, the exponentiation of T should be identical to an MSM constructed with a longer lag time, and the implied timescales will be independent of the lag time.

The implied timescales of our model level off at a lag time of ~4 ns, indicating the model is Markovian (Fig. S8b). Thus, we chose a lag time of 6 ns. The dominant macrostates from our model are displayed in Fig. S3.

1. Swope WC, Pitera JW, & Suits F (2004) Describing Protein Folding Kinetics by Molecular Dynamics Simulations. 1. Theory. *J. Phys. Chem. B* 108:6571-6581.
